1 **Structural basis for how sMAC is packaged for clearance**

2

3 Anaïs Menny<sup>1#</sup>, Marie V. Lukassen<sup>2,3#</sup>, Emma C. Couves<sup>1</sup>, Vojtech Franc<sup>2,3</sup>, Albert J.R.

4 Heck<sup>2,3</sup>, Doryen Bubeck<sup>1\*</sup>

5 <sup>1</sup> Department of Life Sciences, Sir Ernst Chain Building, Imperial College London,  
6 London SW7 2AZ, United Kingdom

7

8 <sup>2</sup> Biomolecular Mass Spectrometry and Proteomics, Bijvoet Center for Biomolecular  
9 Research and Utrecht Institute for Pharmaceutical Sciences, Utrecht University,  
10 Padualaan 8, 3584 CH Utrecht, The Netherlands

11

12 <sup>3</sup> Netherlands Proteomics Center, Padualaan 8, 3584 CH Utrecht, The Netherlands

13

14 # Equal contribution

15 \*Correspondence to: [d.bubeck@imperial.ac.uk](mailto:d.bubeck@imperial.ac.uk)

16

17

18

19 **Unregulated complement activation causes inflammatory and immunological**  
20 **pathologies with consequences for human disease. To prevent bystander damage**  
21 **during an immune response, extracellular chaperones (clusterin and vitronectin)**  
22 **capture and clear soluble precursors to the membrane attack complex (sMAC).**  
23 **However, how these chaperones block further polymerization of MAC and prevent**  
24 **the complex from binding target membranes remains unclear. Here, we address**  
25 **that question by combining cryo electron microscopy (cryoEM) and cross-linking**  
26 **mass spectrometry (XL-MS) to solve the structure of sMAC. Together our data**  
27 **reveal how clusterin recognizes and inhibits polymerizing complement proteins by**

28 **binding a negatively charged surface of sMAC. Furthermore, we show that the**  
29 **pore-forming C9 protein is trapped in an intermediate conformation whereby only**  
30 **one of its two transmembrane  $\beta$ -hairpins has unfurled. This structure provides**  
31 **molecular details for immune pore formation and helps explain a complement**  
32 **control mechanism that has potential implications for how cell clearance pathways**  
33 **mediate immune homeostasis.**

34

## 35 **Introduction**

36 The complement membrane attack complex (MAC) is an immune pore that directly kills  
37 pathogens and causes human disease if left unchecked. One of the first lines of defence  
38 against Gram-negative bacteria <sup>1</sup>, MAC is a potent weapon of the innate immune system  
39 that can rupture lipid bilayers of any composition. Therefore, MAC is highly regulated on  
40 human cells to prevent damage <sup>2,3</sup>. An inhibitory protein blocks MAC assembly and pore  
41 formation that occurs directly on the plasma membrane of human cells <sup>4</sup>. However,  
42 complexes that have improperly assembled on bacterial target membranes are shed into  
43 plasma and are capable of lysing red blood cells <sup>5</sup>. When released from complement-  
44 opsonized pathogens, these complexes can also deposit on nearby macrophages and  
45 initiate a cascade of inflammatory responses causing bystander damage <sup>6</sup>. Therefore,  
46 understanding how MAC is controlled is essential for our ability to tune the activity of a  
47 potent innate immune effector and prevent human disease.

48

49 Soluble MAC (sMAC) is an immune activation complex that is formed from MAC assembly  
50 precursors released into plasma and scavenged by blood-based chaperones. While in

51 healthy individuals sMAC exists in trace amounts, these levels are dramatically elevated  
52 during an immune response, providing a biomarker for infectious and autoimmune  
53 disease <sup>7,8</sup>, transplant <sup>9,10</sup> and trauma <sup>11</sup>. sMAC, also known as sC5b9, is composed of  
54 the complement proteins C5b, C6, C7, C8 and C9 together with the extracellular  
55 regulatory proteins, clusterin and vitronectin <sup>12,13</sup>. Derived from MAC precursors, sMAC is  
56 a model system for understanding structural transitions underpinning MAC assembly. In  
57 both sMAC and MAC, complement proteins associate through their pore-forming  
58 membrane attack complex perforin (MACPF) domain <sup>14,15</sup>. Structures of MAC <sup>15,16</sup> and  
59 soluble C9 <sup>17</sup> show that complement proteins undergo substantial conformational  
60 rearrangements to enable pore formation. While these studies have contributed to our  
61 understanding of the final pore, little is known of how regulators trap transition states and  
62 clear activation byproducts.

63  
64 Clusterin (also called apolipoprotein J) is a chaperone that broadly protects against  
65 pathogenic aggregation of proteins. Upregulated in response to cellular stress <sup>18</sup>, clusterin  
66 recognizes a variety of cellular targets and trafficks cargo for disposal. Within sMAC,  
67 clusterin binds fluid-phase oligomeric complement complexes generated during an  
68 immune response <sup>12</sup> and inhibits polymerization of C9 <sup>19</sup>. The chaperone also directly  
69 associates with amyloid-beta fibrils formed from the polymerizing A $\beta$  peptide and prevents  
70 peptide aggregation <sup>20,21</sup>. Indeed, mutation of the gene encoding clusterin, *CLU*, is one of  
71 the greatest genetic risk factors for late-onset Alzheimer's disease <sup>22</sup>. Although the roles  
72 of clusterin in protein quality control and clearance pathways are well established, the

73 molecular mechanism by which clusterin recognizes and trafficks cargo for degradation  
74 remains unclear.

75

76 To understand how fluid-phase chaperones trap and clear MAC assembly intermediates,  
77 we combined cryo electron microscopy (cryoEM) and cross-linking mass spectrometry  
78 (XL-MS) to solve the structure of sMAC. We find that sMAC is a heterogeneous complex  
79 in which the pore-forming MACPF domain of C9 is caught in a transition state. We also  
80 provide a molecular basis for how C7 may activate C5b to propagate MAC assembly.  
81 Finally, we discover that clusterin can bridge MAC proteins through electrostatic  
82 interactions and obstruct the polymerizing face of C9. Taken together, these data provide  
83 a structural framework for understanding pore formation and the molecular details for a  
84 complement control mechanism.

85

## 86 **Results**

### 87 **sMAC is a heterogeneous multi-protein complex**

88 Complement activation produces soluble protein assemblies that are cleared by  
89 chaperones in blood plasma. To understand how these immune activation  
90 macromolecules are trapped and shuttled for removal, we used cryoEM to visualize  
91 sMAC (Fig. 1 and Supplementary Fig. 1). In accordance with lower resolution studies <sup>14</sup>,  
92 we find that C5b supports the assembly of complement proteins (C6, C7, C8 and C9) into  
93 an arc-like arrangement of MACPF domains. We discover that sMAC extends 260 Å in  
94 length with clear density for extended β-hairpins of MACPF domains. Similar to MAC <sup>15</sup>,  
95 sMAC contains a single copy of the complement proteins C5b, C6, C7 and C8 while the

96 stoichiometry of C9 varied between one to three copies (Supplementary Fig. 1). Using 3D  
97 classification of cryoEM images, we generated reconstructions for complexes with either  
98 one, two or three copies of C9 to a resolution of 3.8 Å, 3.3 Å and 3.5 Å, respectively (Fig.  
99 1a, 1b and Supplementary Fig. 1). Anisotropy in 1C9-sMAC reconstruction prevented  
100 further modeling of this complex; however, cryoEM density maps for the 2- and 3-C9  
101 sMAC complexes were sufficient to build a near-complete atomic model for all  
102 complement proteins (Fig. 1a, 1b, Supplementary Fig. 2 and Supplementary Table 1).  
103 Density for clusterin and vitronectin were not well resolved in these initial maps, consistent  
104 with the flexible nature of these chaperones.

105

106 To confirm the composition and structure of proteins in sMAC, we performed label-free  
107 quantitative proteomics and XL-MS on sMAC. Our proteomics analysis confirmed the  
108 presence of all complement proteins (C5b, C6, C7, C8 and C9), with C9 twice as  
109 abundant as the others (Supplementary Fig. 3). In agreement with sedimentation  
110 centrifugation measurements<sup>13</sup>, our analyses also revealed the presence of clusterin and  
111 vitronectin with abundances 2-6 times higher than that of C5b, C6, C7 and C8  
112 (Supplementary Fig. 3). All other proteins detected in the sMAC sample were an order of  
113 magnitude less abundant. In the XL-MS data we observed a number of intra- and inter-  
114 protein cross-links between complement proteins, with 88% fitting the distance restraints  
115 of the atomic models derived from our sMAC reconstructions (Supplementary Fig. 4 and  
116 Source data file). Furthermore, we observed several inter-links between complement  
117 proteins, vitronectin and clusterin, confirming their presence in the complex (Fig. 1c,  
118 Supplementary Fig. 3 and Source data file). Mass photometry of sMAC showed a handful

119 of co-occurring multi-protein complexes with distinct masses between 971 and 1374 kDa  
120 (Supplementary Fig. 3). After subtracting masses corresponding to the core complement  
121 complex (C5b6, C7, C8) together with one, two or three C9 molecules, we are left with  
122 excess masses of minimally ~241 and maximally ~777 kDa. As the molecular weights of  
123 secreted clusterin and vitronectin are ~80 kDa and ~75 kDa, respectively, we attribute  
124 this excess to multiple copies of both these chaperones.

125

126 We next sought to verify that purified sMAC, used for cryoEM and XL-MS, reflects the  
127 complex formed during an immune response. Specifically, we used bacteria to activate  
128 complement directly in serum and compared these complexes with those found in non-  
129 activated serum. We separated serum components by size exclusion chromatography  
130 (SEC) and analyzed individual fractions by liquid chromatography-tandem mass  
131 spectrometry (LC-MS/MS). By profiling of sMAC components in serum, we found that in  
132 non-activated serum proteins these components elute later in the SEC profile,  
133 corresponding to monomeric or low molecular weight complexes (Fig. 1d). Upon  
134 activation, the profiles of all sMAC components largely co-elute and are dramatically  
135 shifted to fractions that correspond to higher mass ranges. In agreement with our  
136 proteomic and cryoEM analysis, the most abundant complexes correlate with a ratio of 2-  
137 3 C9 molecules to the average abundance of the core complex (C5b6, C7, C8) and with  
138 clusterin as the main binding-chaperone. Together these data confirm that sMAC is a  
139 heterogeneous assembly comprising a single copy of a conserved core complex (C5b6,  
140 C7 and C8) together with multiple copies of C9, clusterin and vitronectin in a mixture of  
141 stoichiometries.

142

### 143 **Clusterin bridges complement proteins through electrostatic interactions**

144 With the high abundance of clusterin and vitronectin in sMAC, we next sought to identify  
145 their location in the complex. Given the extensive cross-links observed between the  
146 chaperones and C9 (Fig. 1c, Supplementary Fig. 3, and Source data file), we subtracted  
147 density corresponding to proteins C5b6, C7 and C8 from the raw EM images and focused  
148 our refinement on the C9 component of the complex (Fig. 2a). In doing so, we resolve a  
149 10nm stretch of density that bridges the negatively charged crown of C9 lipoprotein  
150 receptor class A (LDL) domains. This density caps a similarly negatively charged  
151 polymerizing face of the C9 MACPF (Fig. 2c and d). We also observe a second belt of  
152 density below the C9 epidermal growth factor (EGF) domains (Fig. 2c). Locally sharpened  
153 maps indicate tubular densities consistent with alpha helices; however, this region  
154 remains highly flexible and we were unable to model it based on our cryoEM maps.

155

156 We next considered the possible identity of this extra density. All complement proteins  
157 within sMAC are accounted for within the map; therefore, we conclude that this density is  
158 composed of plasma-based chaperones. Based on our XL-MS data, both clusterin and  
159 vitronectin interact with C9 (Fig. 1c and Supplementary Fig. 3). We then plotted the  
160 location of complement protein residues in our 3C9-sMAC model that uniquely cross-link  
161 to each chaperone (Supplementary Fig. 3). We find that cross-links between clusterin and  
162 C9 congregate around the two extra densities observed in our focus-refined map (Fig.  
163 2c). By contrast, unique cross-links between vitronectin and C9 lie on the back face of the  
164 map (Supplementary Fig. 3). These residues are not resolved in the final C9 of the 3C9-

165 sMAC reconstruction; therefore, it is also possible that they reflect cross-links to the  
166 mobile terminal C9 in other sMAC stoichiometries. Additionally, we find that the number  
167 of cross-links between vitronectin and C9 are identified about 3.5 times less than those  
168 observed to clusterin. As the cross-linkers used in these experiments bridge charged  
169 residues (Lys-Lys or Asp/Glu-Lys), these data could indicate that vitronectin binds to a  
170 hydrophobic region of C9, which is in agreement with immuno-gold labeling experiments  
171 that map the vitronectin bind-site to the MACPF hydrophobic hairpins <sup>23</sup>. While we  
172 observe some density for this region in other focused refinements (Supplementary Fig.  
173 1), the area is not well ordered in our maps. Taken together, our data demonstrate that  
174 clusterin likely occupies some or all of the extra density present above the C9 LDL  
175 domains in our focus-refined map.

176  
177 Clusterin is a highly glycosylated <sup>24</sup>, disulfide-linked heterodimer <sup>25</sup> whose tertiary  
178 structure remains unknown. Using trRosetta <sup>26</sup>, which combines co-evolutionary data with  
179 deep learning, we generated a panel of possible clusterin structural models  
180 (Supplementary Fig. 5). All models contained a common helical core component with  
181 structural similarity to the MAC inhibitor CspA from *Borrelia burgdoferi* <sup>27,28</sup>  
182 (Supplementary Fig. 5). The clusterin core model extends 10nm in length and is  
183 consistent with the density in our focus-refined map (Fig. 2a and b). To further optimize  
184 our model, we then applied known disulfide-bond restraints for clusterin using Modeller  
185 <sup>29</sup>. We next assessed the validity of our model by plotting the unique intra-molecular  
186 clusterin cross-links observed in our XL-MS experiments (Fig. 2b). In doing so, we verify  
187 that 92% of clusterin cross-links satisfy the distance restraints of our model



188 (Supplementary Fig. 5 and Source Data file). Our analyses show that clusterin contains  
189 an extended helical domain capped by a helical bundle, whose arrangement is defined  
190 by five disulfide bonds (Fig. 2b). The electrostatic surface potential of the clusterin core  
191 model reveals a contiguous patch of positive charge, complementary to the surface  
192 charge of C9 at the interface with clusterin in sMAC (Fig. 2d). Beyond this core, we find  
193 that clusterin makes additional cross-links with a range of complement proteins distal from  
194 C9 (Supplementary Fig. 3). Indeed, the ensemble of models produced by trRosetta  
195 reveals long extended domains that flexibly hinge from the core (Supplementary Fig. 5).  
196 Altogether, our data are consistent with a model that clusterin is a highly flexible protein,  
197 whose core domain engages cargo through electrostatic interactions to block propagation  
198 of polymerizing proteins.

199

### 200 **C-terminal domains of C7 position the C345C domain of C5b**

201 Previous structural studies of MAC were limited in resolution due to the flexibility and  
202 varied curvature of the complex<sup>16</sup>. In particular, the C-terminal domains of C7 and their  
203 interaction with C5b remained unmodeled. As a result, it remained unclear how C7  
204 activates C5b6 to propagate MAC assembly. To understand how the C7 C-terminal  
205 domains prime the complex for C8 recruitment, we sought to improve the resolution of  
206 the map in this area. Density for C5b was best resolved in our 2C9 sMAC map; therefore,  
207 we used this map for subsequent refinement steps in which density corresponding to the  
208 MACPF arc was subtracted (Fig. 3a). By focusing our alignment on C5b, we calculated a  
209 map with a resolution of 3.6 Å which enabled us to build a near complete atomic model  
210 for sMAC incorporated C7. By contrast to the extensive interaction interface between the

211 C6 complement control protein (CCP) domains and C5b, we find that the binding site of  
212 C5b and the C-terminal CCPs of C7 is punctuated by three specific contact points (Fig.  
213 3b). In our map, we observe clear side-chain density for ionic interactions between  
214 C7:Asn<sub>572</sub>/Arg<sub>590</sub> and Cb5:Gln<sub>73</sub>, which appears to stabilize the position of the first C7  
215 CCP. We also observe unambiguous density for C5b:Trp<sub>761</sub> that wedges into a  
216 hydrophobic groove connecting the two CCPs and likely impacts the orientation of these  
217 domains. Stabilized by a glycan on C5b (Asn<sub>983</sub>), a flexible linker connects the C7 CCPs  
218 and the final two factor I-like membrane attack complex (FIM) domains. Our data show  
219 that the first FIM domain is responsible for binding the C345C domain of C5b (Fig. 3a and  
220 d). Superposition of C5b from the soluble C5b6<sup>14</sup> and its conformation in sMAC shows  
221 that this domain undergoes the largest movement during MAC assembly (Fig. 3d).  
222 Interestingly, we find that the orientation of the C345C domain of C5b in our model  
223 overlays with its position in a structural homologue, C3b, when bound to Factor B and  
224 properdin in an activated conformation<sup>30</sup> (Fig. 3e). In addition, we find that the  
225 Macroglobulin (MG) 4 and MG5 domains of C5b also move to accommodate C8 allowing  
226 a network of salt bridges between the loops of the C5b MG scaffold and the LDL domain  
227 of C8 $\beta$  (Fig. 3c). We therefore propose that the C-terminal domains of C7 may position  
228 the C5b C345C domain in an activated conformation that enables the recruitment of  
229 complement proteins to the MG scaffold.

230

### 231 **Structural transitions of MACPF domains**

232 The MACPF domain of complement proteins undergo dramatic structural rearrangements  
233 during pore formation. Structures of soluble<sup>17,31-33</sup> and membrane inserted forms<sup>16</sup> of

234 complement proteins have shown that two helical bundles within the MACPF (TMH1,  
235 TMH2) unfurl to form transmembrane  $\beta$ -hairpins. To understand how the helix-to-hairpin  
236 transition of MACPF residues is mediated, we sought to model a conformation of C9 for  
237 which MAC assembly is stalled. As the density for C9 is best resolved in the 2C9-sMAC  
238 complex, we used this map for subsequent analyses. We next subtracted density for  
239 C5b6, C7 and C8 from the raw images. By then focusing refinement on the remaining C9,  
240 we were able to generate a map at 3.3 Å resolution in which density for both copies of C9  
241 were clearly resolved (Fig. 4 and Supplementary Fig. 1).

242

243 We discover that within sMAC, C9 adopts two distinct conformations. Upon binding C8,  
244 the first C9 molecule undergoes a complete transition in which both TMH1 and TMH2 are  
245 extended, and CH3 is in a position analogous to MAC (Supplementary Fig. 6). By  
246 contrast, only one helical bundle (TMH1) has unfurled in the terminal C9 conformation.  
247 There is no density for the extended hairpins of TMH2; instead, these residues adopt a  
248 conformation similar to that of soluble C9 (Fig. 4a, b). To validate our model for the  
249 terminal C9 conformation, we used the XL-MS data and mapped intramolecular C9 cross-  
250 links. We identify four cross-links within TMH2 that satisfy all the distance restraints when  
251 plotted on the stalled conformation (9 Å, 14 Å, 17 Å, 20 Å) (Fig. 4e). Two are over-length  
252 when mapped onto the MAC conformation of C9 (17 Å, 28 Å, 32 Å, 59 Å), further  
253 supporting that C9 transmembrane hairpins unfurl sequentially. In the stalled C9, CH3  
254 follows the movement of the central  $\beta$ -sheet of the MACPF domain, which aligns with the  
255 preceding monomer (Fig. 4b). In doing so, the helical TMH2 bundle swings out and  
256 positions the sidechain of Arg<sub>348</sub> proximal to a glycan (NAG-Asn<sub>394</sub>) on the  $\beta$ -strand of the

257 penultimate C9 molecule (Fig. 4c). We hypothesize that this interaction may play a role  
258 in stabilizing an intermediate state in which the preceding monomer templates TMH1  $\beta$ -  
259 strands and correctly positions TMH2 for sequential unfurling (Fig. 4f).

260

261 We next considered how this stalled conformation of C9 might help us understand  
262 disease-related variants. Several point mutations within the C9 MACPF are associated  
263 with Age-related Macular Degeneration (AMD)<sup>34</sup>. In particular, substitution of Pro<sub>146</sub>  
264 (P146S) within a loop of C9 directly influences polymerization of C9. Unlike its position in  
265 the MAC, we find that this loop flips outward in the stalled conformation, sterically blocking  
266 subsequent C9 incorporation (Fig. 4d). Substitution of proline at this position may impact  
267 the ability of this loop to serve as a checkpoint for polymerization. Taken together, our  
268 sMAC model provides a structural timeline in which the sequential extension of  
269 transmembrane  $\beta$ -hairpins may be regulated by the preceding monomer and a proline  
270 latch on the polymerizing MACPF interface (Fig. 4f).

271

## 272 **Discussion**

273 In sMAC, fluid-phase chaperones prevent bystander damage by trapping MACPF-  
274 containing complement complexes. As such, sMAC represents an important model  
275 system to probe structural transitions of pore-forming proteins. In addition to MAC, two  
276 other human immune pores (perforin-1 and MPEP-1) rupture membranes using MACPF  
277 domains (Supplementary Fig. 6). While structures are available for both soluble and  
278 membrane-inserted states of these complexes<sup>35-37</sup>, mechanistic details governing the  
279 transition between the two conformations have been more challenging to study.

280

281 Here we capture a stalled conformation of C9 that allows us to define a structural pathway  
282 for MACPF pore-formation (Fig. 4f). As soluble monomers integrate into a growing pore,  
283 the central kinked  $\beta$ -sheet of the MACPF straightens to align with the preceding monomer.  
284 Our data show how two helical bundles (CH3 and TMH2) rotate to stabilize a transition  
285 state, in which a basic residue on TMH2 interacts with a glycan on the  $\beta$ -strands of a  
286 preceding monomer. We hypothesize that this interaction may play a role in correctly  
287 positioning TMH2 as the first  $\beta$ -hairpin (TMH1) geometry is templated by the strands of  
288 the preceding monomer. Indeed, removal of N-linked glycans from C9 resulted in MACs  
289 with distorted  $\beta$ -barrels<sup>16</sup>. The pore is then propagated by the sequential insertion of the  
290 second  $\beta$ -hairpin, TMH2. We note that within the pore conformation, MPEG-1 contains a  
291 glycan on the leading edge of TMH2<sup>37</sup>, analogous to C9. Remarkably, superposition of a  
292 soluble conformation of MPEG-1 positions a basic residue proximal to TMH2 glycan of  
293 the preceding monomer (Supplementary Fig. 6). We therefore propose that glycans may  
294 play a role in stabilizing transition states of MACPF pore-formation.

295

296 In addition to understanding immune pore-formation, our combined cryoEM and XL-MS  
297 data provide a molecular basis for how clusterin binds cargo. Based on results presented  
298 here, we show that clusterin is a predominantly helical protein that binds to a negatively  
299 charged surface on sMAC. Specifically, we find that clusterin caps the polymerizing face  
300 of the leading MACPF domain, thus providing a mechanism for how clusterin prevents  
301 C9 polymerization<sup>38</sup>. We also define a binding site for clusterin that spans LDL domains  
302 of multiple complement proteins, in agreement with studies that suggest clusterin binds a

303 structural motif common to C7, C8 $\alpha$  and C9<sup>38</sup>. Density for clusterin at this site is the most  
304 well resolved in the 3C9-sMAC maps; therefore, the interaction is likely secured through  
305 repeated contacts across oligomers. Clusterin also binds oligomeric amyloid-beta fibrils  
306 through the same interaction interface as sMAC<sup>39</sup>. As clusterin inhibits amyloid-beta  
307 aggregation *in vitro*<sup>40,41</sup>, this may serve as a general mechanism for how clusterin blocks  
308 polymerization of potentially pathogenic proteins. In addition to the LDL binding site, we  
309 observe a second stretch of density below the EGF domains of C9. This density also  
310 maps to a clusterin binding-site supported by our XL-MS data. Indeed, our MS data reveal  
311 that multiple copies of clusterin are present in sMAC. While the role of this second binding  
312 site in regulating pore formation remains unclear, it may be important in linking cargo with  
313 an endocytic receptor for clearance<sup>42</sup>. Clusterin is rapidly emerging as a key player at  
314 the crossways between clearance pathways and immune homeostasis<sup>43</sup>. Our structure  
315 of sMAC shows how clusterin can bind polymerizing cargo and opens new lines of  
316 investigation into the role of clusterin in immunobiology.

317

318 In summary, we have solved multiple structures of complement activation  
319 macromolecules by combining cryoEM and mass spectrometry. These structures  
320 underpin a complement control pathway that prevents bystander damage during an  
321 immune response. Our structural analyses show how chaperones trap pore-forming  
322 intermediates and bind oligomeric proteins to prevent further polymerization, which may  
323 also be relevant for controlling pathogenic aggregation of amyloids. Finally, we anticipate  
324 that our structural findings will provide mechanistic insight into transition states of immune  
325 pores.

326

## 327 **Materials and methods**

### 328 **CryoEM sample and grid preparation**

329 To prepare cryoEM grids, sMAC (Complement Technologies) was diluted to 0.065 mg/ml  
330 in 120 mM NaCl, 10 mM Hepes pH7.4 and used for freezing within the hour. 4  $\mu$ l were  
331 deposited on glow-discharged gold grids with a lacey carbon film (Agar Scientific). After  
332 a 10 sec incubation at room temperature and 95% humidity, grids were blotted and flash  
333 frozen in liquid ethane using a Vitrobot Mark III (Thermo Fisher Scientific). CryoEM  
334 conditions were screened using a Tecnai T12 (Thermo Fisher Scientific) operated at  
335 120 kV. Two data sets were collected on 300 kV Titan Krios microscopes (Thermo Fisher  
336 Scientific) equipped with K2 Quantum direct electron detectors (Gatan) operated in  
337 counting mode at a magnification of 130k, corresponding to a calibrated pixel size of 1.047  
338  $\text{\AA}$  and 1.048  $\text{\AA}$  for each dataset, respectively. The first data set was collected at 0 degree  
339 tilt and consisted of 11,107 image stacks taken over a defocus range of -1.1 to -2.3  $\mu$ m  
340 in 0.3  $\mu$ m steps. The total exposure time was 8 seconds which included 40 frames and  
341 resulted in an accumulated dose of 40 electrons per  $\text{\AA}^2$ . As initial processing of the first  
342 dataset showed the particles adopted a favored orientation, we used the cryoEF software  
343 <sup>44</sup> to estimate the appropriate tilt angle for data collection and acquisition of missing views.  
344 The second data set was collected at a 37 degree tilt and consisted of 2,596 image stacks  
345 over a defocus range of -1.1 to -2.1  $\mu$ m. Movie stacks were collected with similar  
346 conditions as dataset-1. A summary of the imaging conditions is presented in  
347 Supplementary Table 1.

### 348 **Image processing**

349 Electron micrograph movie frames were aligned with a Relion-3.1 <sup>45</sup> implementation of  
350 MotionCor. CTF parameters were estimated using CTFFIND4-1 <sup>46</sup>. The datasets were  
351 manually curated to remove movies with substantial drift and crystalline ice. For dataset-  
352 1, a small subset of micrographs across the whole defocus range were randomly selected  
353 for manual picking in Relion. Following 2D classification, classes with diverse orientations  
354 were used for Autopick of the entire dataset. Due to the use of a lacey carbon film grid, a  
355 large portion of micrographs were acquired over a steep ice gradient and with visible  
356 carbon edges. Relion Autopick performed best to avoid over-picking on carbon when  
357 calibrated to pick in thinner ice areas. To complement the particle stacks, crYOLO <sup>47</sup> was  
358 used in parallel and specifically trained to pick in thicker ice areas. Particles were  
359 extracted at 4.188 Å/px (bin by 4) and subjected to iterative 2D classification to remove  
360 ice contamination, carbon edges and broken particles. An initial model was generated in  
361 Relion which was strongly low-pass filtered to 60 Å resolution and used as a starting  
362 model for 3D auto-refinement. The initial refinement with 595,890 particles revealed  
363 strong particle distribution anisotropy. To improve the diversity of particle orientations,  
364 projections of low occurrence views were generated from the initial reconstruction and  
365 used as templates for re-picking the micrographs in Relion. In parallel, the  
366 `reweight_particle_stack.py` script (available on the Leschziner lab Github) was iteratively  
367 used to randomly select and remove particles from the over-represented orientation,  
368 followed by 3D auto-refinements of the remaining particles. Duplicated particles identified  
369 within a distance threshold of 10 nm were removed at each data merging step resulting  
370 in a final 389,625 particles in dataset-1. For dataset-2, manual picking of a small subset  
371 of micrographs followed by 2D classification at 4.192 Å/px (bin by 4) was first done and



372 five classes were then used for autopicking of all the micrographs in Relion. The picks  
373 were cleaned in iterative 2D classifications, resulting in a final 83,376 particles. Unbinned  
374 particles from dataset-1 and -2 were then merged for a 3D auto-refinement yielding a  
375 consensus map at 3.8 Å with 473,001 particles. Low map quality in the C9 arc suggested  
376 heterogeneity in this area. The aligned particles were thus subtracted to only keep the C9  
377 arc, followed by 3D classification without refinement (bin 4, T=20, 10 classes) which  
378 identified three sMAC stoichiometries, with 1 C9 (20.6 %), 2 C9 (29.5 %) or 3 C9 (17.9 %  
379 of particles). Particle stacks were reverted to the original images and each class was 3D  
380 auto-refined individually, followed by Bayesian polishing and multiple rounds of per-  
381 particle CTF refinements <sup>48</sup> (Supplementary Fig. 1) to generate the final reconstructions  
382 for 1C9-sMAC (EMD-12649), 2C9-sMAC (EMD-12651) and 3C9-sMAC (EMD-12650)  
383 (resolutions 3.8 Å, 3.3 Å and 3.5 Å respectively). Further heterogeneity analysis via multi-  
384 body refinement of sMAC revealed flexibility within the complex. To better resolve the C-  
385 terminal domains of C5b and C7, density subtraction of the MACPF arc was done on the  
386 best-resolved 2C9-sMAC map. The subtracted particles were then aligned in a masked  
387 3D auto-refinement to generate a reconstruction at 3.6 Å (EMD-12648). Similarly, the  
388 2C9-sMAC particles were density subtracted only keeping the signal from the terminal 2  
389 C9s. The 2C9 subtracted particle set was further subjected to 2D classification to remove  
390 any remaining heterogeneity in the number of C9s. A final 96,118 particles were selected  
391 for a masked 3D auto-refinement resulting in a 3.3 Å reconstruction (EMD-12647). The  
392 3C9-sMAC reconstruction contained weak density above the C9 arc suggesting poor  
393 alignment of particles in this area. To better resolve this area, density was subtracted from  
394 the raw particles using a generous mask extending above the density and containing the

395 three terminal C9s, followed by 3D auto-refinement. A second round of subtraction was  
396 done on the newly aligned particles to only keep the MACPF region and the newly  
397 resolved density above it. A final masked 3D auto-refinement generated a reconstruction  
398 at 3.8 Å (EMD-12646). Resolutions of maps were determined using the masking-effect  
399 corrected Fourier Shell Correlation (FSC) as implemented in Relion post-processing.

#### 400 **Model building and refinement**

401 Models were built and refined into locally sharpened maps generated by DeepEMhancer  
402 <sup>49</sup>. To create initial starting models, complement proteins (C5b, C6, C7, and C8) from  
403 MAC (PDB ID: 6H04) <sup>16</sup> were augmented or substituted with higher resolution structures  
404 for individual domains. Specifically, the TED, MG8 and C345C domains of C5b and C6  
405 CCP domains were derived from the C5b6 crystal structure (PDB ID: 4A5W) <sup>14</sup>; C7-FIM  
406 domains were included from the NMR structure (PDB ID: 2WCY) <sup>50</sup>. As we observe two  
407 conformations of C9 in sMAC, we created two unique starting models (C9<sub>1</sub> and C9<sub>2</sub>). C9<sub>1</sub>  
408 was derived from its MAC conformation (trimmed to remove unresolved TMH2 residues).  
409 C9<sub>2</sub> was generated by replacing TMH2 residues from the MAC conformation of C9 (PDB  
410 ID: 6H03) <sup>16</sup> with TMH2 helices from the soluble murine C9 structure (PDB ID: 6CXO) <sup>17</sup>.  
411 Amino acids from the murine model were subsequently changed to the human sequence  
412 in Coot <sup>51</sup>. All missing amino acids in C9 were manually built in areas where density was  
413 present. Flexible regions of TMH1 hairpins were removed to match the density. The  
414 terminal C9 EGF domain was also removed from the model as density for this region was  
415 not well defined. Where merited by the EM density, missing loops and individual amino  
416 acids were manually built in Coot. Where appropriate, known calcium ions were also  
417 added in Coot. All models were refined into the EM densities using ISOLDE <sup>52</sup> as a built-

418 in module in ChimeraX <sup>53</sup>, with secondary structure geometries restraints and ligand  
419 position restraints applied. All reasonable disulfides were formed in ISOLDE to stabilize  
420 the protein chains during refinements.

421 We used density subtracted focus-refined maps to generate more accurate models for  
422 individual subregions. To generate the model for the interaction interface between C5b  
423 and C7, individual domains derived from higher resolution structures (C5b:C345C,  
424 C5b:MG8, C6:CCPs and C7:FIMs) were rigid body fitted into the density subtracted C5b-  
425 focus refined 2C9-sMAC (EMD-12648) using ChimeraX. Models were merged with the  
426 rest of C5b, C6 and C7 in Coot and further refined in ISOLDE where adaptive distance  
427 restraints were kept active for C5b:C345C and two C7:FIM domains. The density  
428 subtracted C9-focus refined 2C9-sMAC (EMD-12647) was used to refine atomic models  
429 for the two C9 conformations using ISOLDE.

430 Following building and refinement in the density subtracted maps, final composite models  
431 were created for both 2C9-sMAC (PDB ID: 7NYD) and 3C9-sMAC (PDB ID: 7NYC). To  
432 generate the composite 2C9-sMAC model we merged models derived from the C5b-focus  
433 refined map and those derived from the C9-focus refined map with remaining domains of  
434 complement proteins. The composite model was then refined into the full 2C9-sMAC map  
435 (EMD-12651), focusing on interaction interfaces between protein chains. Here the whole  
436 of the terminal C9 (C9<sub>2</sub>) was stabilized with adaptive distance restraints and not refined  
437 as the density for this chain was of poorer quality in the full 2C9-sMAC map. To build the  
438 3C9-sMAC model, C9<sub>1</sub> from 2C9-sMAC was duplicated and fitted in the C9<sub>1</sub> and C9<sub>2</sub>  
439 positions of 3C9-sMAC, while the terminal C9 from 2C9-sMAC was placed in the last  
440 position of the 3C9-sMAC arc (C9<sub>3</sub>) in ChimeraX. All other sMAC components were then

441 added and the composite model was refined in the 3C9-sMAC map (EMD-12560) using  
442 ISOLDE, with secondary structure geometries restraints and ligand position restraints  
443 applied. Again, adaptive distance restraints were imposed for the C5b:C345C domain. In  
444 both 2C9- and 3C9-sMAC models, side chains of the C345C domain were removed as  
445 the resolution did not permit confident refinement of their positions. In addition, side  
446 chains from other places across the model were punctually removed after refinement  
447 where density was lacking. N-linked glycans were built using the Carbohydrate tool in  
448 Coot. For C-linked and O-linked glycans, the sugars were fitted in the density from the  
449 Coot monomer library and linked to the protein chain using the Acedrg tool <sup>54</sup>. Glycans  
450 and linked side chains were then real-space refined in Coot. Finally, local B-factors of the  
451 composite models were refined in REFMAC5 <sup>55</sup> using the local resolution filtered map  
452 from Relion. Map-Model FSC and the overall quality of the models were assessed in the  
453 full 2C9- and 3C9-sMAC maps using the cryoEM validation tools in Phenix <sup>56</sup> and  
454 MolProbity <sup>57</sup>.

#### 455 **Map visualization and analysis**

456 Density maps and models were visualized in ChimeraX. Local resolution of the maps and  
457 angular distribution of the particles were assessed in Relion and visualized in ChimeraX.  
458 Coulombic electrostatic potentials of interaction interfaces were calculated and visualized  
459 in ChimeraX. Interaction interfaces and structural rearrangements of complement  
460 proteins were analyzed in Coot and ChimeraX. RMSD values between structures of C5b6  
461 were calculated in PyMOL Molecular Graphics System, Version 2.0 Schrödinger, LLC.  
462 Figures were generated in ChimeraX, PyMOL and DataGraph.

#### 463 **Bottom-up LC-MS/MS analysis of sMAC**

464 For bottom-up LC-MS/MS analysis, purified sMAC (Complement Technologies) in PBS  
465 buffer (10 mM sodium phosphate, 145 mM NaCl, pH 7.3) at a concentration of 1 mg/ml  
466 were introduced into the digestion buffer containing 100 mM Tris-HCl (pH 8.5), 1% w/v  
467 sodium deoxycholate (SDC), 5 mM Tris (2-carboxyethyl) phosphine hydrochloride  
468 (TCEP) and 30 mM chloroacetamide (CAA). Proteins were digested overnight with trypsin  
469 at an enzyme-to-protein-ratio of 1:100 (w/w) at 37 °C. After, the SDC was precipitated by  
470 bringing the sample to 1% trifluoroacetic acid (TFA). The supernatant was collected for  
471 subsequent desalting by an Oasis  $\mu$ Elution HLB 96-well plate (Waters) positioned on a  
472 vacuum manifold. The desalted proteolytic digest was dried with a SpeedVac apparatus  
473 and stored at -20°C. Prior LC-MS/MS analysis, the sample was reconstituted in 2% formic  
474 acid (FA). Approximately 300 fmol of peptides was separated and analyzed using the  
475 HPLC system (Agilent Technologies) coupled on-line to an Orbitrap Fusion Lumos mass  
476 spectrometer (Thermo Fisher Scientific). The peptides were first trapped on a 100  $\mu$ m  $\times$   
477 20 mm trap column (in-house packed with ReproSil-Pur C18-AQ, 3  $\mu$ m) (Dr. Maisch  
478 GmbH, Ammerbuch-Entringen, Germany) and then separated on the in-tandem  
479 connected 50  $\mu$ m  $\times$  500 mm analytical column (in-house packed with Poroshell 120 EC-  
480 C18, 2.7  $\mu$ m) (Agilent Technologies). Mobile-phase solvent A consisted of 0.1% FA in  
481 water, and mobile-phase solvent B consisted of 0.1% FA in acetonitrile (ACN). The flow  
482 rate was set to 300 nL/min. A 90 min gradient was used as follows: 0-5 min, 100% solvent  
483 A; 13-44% solvent B within 65 min; 44-100% solvent B within 3 min; 100% solvent B for  
484 5 min; 100% solvent A for 12 min. The mass spectrometer was operated in positive ion  
485 mode, and the spectra were acquired in the data-dependent acquisition mode. A  
486 Nanospray was achieved using a coated fused silica emitter (New Objective) (outer

487 diameter, 360  $\mu\text{m}$ ; inner diameter, 20  $\mu\text{m}$ ; tip inner diameter, 10  $\mu\text{m}$ ) biased to 2 kV. For  
488 the MS scans, the mass range was set from 350 to 1800  $m/z$  at a resolution of 60,000,  
489 maximum injection time 50 ms, and the normalized automatic Gain Control (AGC) target  
490 set to  $4 \times 10^5$ . For the MS/MS measurements, higher-energy collision dissociation  
491 (EThcD) with supplementary activation energy of 27% was used. MS/MS scans were  
492 performed with fixed first mass 100  $m/z$ . The resolution was set to 30,000; the AGC target  
493 was set to  $1 \times 10^5$  the precursor isolation width was 1.6 Da and the maximum injection  
494 time was set to 250 ms. The LC-MS/MS data were searched against the  
495 UniProtKB/Swiss-Prot human proteome sequence database with MaxQuant software  
496 (version 1.5.3.30)<sup>58</sup> with the standard settings and trypsin as digestion enzyme. For label-  
497 free quantification intensity based absolute quantification (iBAQ) values were selected as  
498 output.

#### 499 **Cross-linking**

500 Purified sMAC (10 $\mu\text{g}$ , Complement Technologies) was cross-linked using 0-2 mM DSS  
501 or 0-20 mM DMTMM for 30 min at RT, followed by quenching using a final concentration  
502 of 50 mM Tris. Cross-linked samples were analyzed by SDS-PAGE and blue native-  
503 PAGE (BN-PAGE) to determine an optimal cross-linker to protein ratio. The optimal DSS  
504 and DMTMM concentration (1 mM and 15 mM, Supplementary Fig. 4) was used for cross-  
505 linking of 20  $\mu\text{g}$  sMAC (0.5 mg/ml) in triplicates. After quenching the reactions, protein  
506 precipitation was performed by adding three times 55  $\mu\text{l}$  cold acetone and subsequent  
507 incubation at -20  $^{\circ}\text{C}$  overnight. Precipitated samples were centrifuged at 12,000  $\times$  g for  
508 20 min. After careful removal of the supernatant, the remaining pellet was air-dried until  
509 no acetone solution was visible anymore. Pellets were resuspended in 50  $\mu\text{l}$  ammonium

510 bicarbonate with 0.33 µg trypsin (1:60) and incubated with shaking for 4 h at 37 °C. The  
511 solubilized pellets were reduced by 5 mM TCEP for 5 min at 95 °C followed by alkylation  
512 with 30 mM CAA for 30 min at 37 °C. Digestion was performed overnight by 0.4 µg trypsin  
513 (1:50) at 37 °C. The samples were deglycosylated using PNGase F (1 unit/10 µg) for 3 h  
514 at 37 °C. Next, the samples were acidified with TFA before desalting using an Oasis HLB  
515 plate (Waters, Wexford, Ireland). Finally, the eluent was dried completely and solubilized  
516 in 2% FA before LC-MS/MS-analysis.

### 517 **LC-MS/MS analysis of cross-linked sMAC**

518 Data was acquired using an Ultimate 3000 system (Thermo Scientific) coupled on-line to  
519 an Orbitrap Fusion (Thermo Scientific). First, peptides were trapped using a 0.3x5 mm  
520 PepMap-100 C18 pre-column (Thermo Scientific) of 5 µm particle size and 100 Å pore  
521 size prior to separation on an analytical column (50 cm of length, 75 µm inner diameter;  
522 packed in-house with Poroshell 120 EC-C18, 2.7 µm). Trapping of peptides was  
523 performed for 5 min in 9% solvent B (0.1 % FA in 80 % v/v ACN) at a flow rate of 0.005  
524 ml/min. The peptides were subsequently separated as follows: 9-13 % solvent B in 1 min,  
525 13-44 % in 70 min, 44-99 % in 3 min and finally 99 % for 4 min. The flow was 300 nl/min.  
526 The mass spectrometer was operated in a data-dependent mode. Full-scan MS spectra  
527 from 350-1800 Th were acquired in the Orbitrap at a resolution of 120,000 with the AGC  
528 target set to  $1 \times 10^6$  and maximum injection time of 100 ms. In-source fragmentation was  
529 turned on and set to 15 eV. Cycle time for MS<sup>2</sup> fragmentation scans was set to 2 s. Only  
530 peptides with charge states 3-8 were fragmented, and dynamic exclusion properties were  
531 set to  $n = 1$ , for a duration of 20 s. Fragmentation was performed using in a stepped HCD  
532 collision energy mode (27, 30, 33 %) in the ion trap and acquired in the Orbitrap at a

533 resolution of 50,000 after accumulating a target value of  $1 \times 10^5$  with an isolation window  
534 of 1.4 Th and maximum injection time of 180 ms.

### 535 **Data analysis of XL-MS**

536 The raw data was first searched using MaxQuant (version 1.6.10.0) to generate a  
537 database for the cross-linking search. The signal peptides of the sMAC components were  
538 removed. Next, the raw data was searched using pLink (version 2.3.9)<sup>59</sup> using the  
539 conventional cross-linking flow type and DSS or DMTMM as cross-linker. Trypsin was set  
540 as a digestion enzyme with two missed cleavages. The peptide mass was 600-6000 Da  
541 and peptide length 6-60 amino acids. Carbamicomethyl (C) was set as fixed modification  
542 and oxidation (M), hex (W), sulfo (Y), and acetyl (protein N-term) as variable  
543 modifications. Precursor, fragment, and filter tolerance were set to 10 ppm and FDR 5%  
544 at the PSM level. Cross-linked and loop-linked sites identified in all triplicates were  
545 selected for further analysis (DSS: 319 XL, DMTMM: 221 XL, Source data file). The cross-  
546 links were mapped on the sMAC structures using PyMOL to obtain C $\alpha$ -C $\alpha$  distances.  
547 Distance restraints were set to <20 Å for DMTMM and <30 Å for DSS cross-links. The  
548 circos plots were generated in R and only cross-links involving the complement  
549 components C5, C6, C7, C8 $\alpha$ , C8 $\beta$ , C8 $\gamma$  and C9 were included.

### 550 **Mass photometry**

551 Mass photometry data was collected on a Refeyn One<sup>MP</sup> instrument. The instrument was  
552 calibrated with a protein standard (made in-house). The following masses were used to  
553 generate a standard calibration curve: 73, 149, 479, and 800 kDa. Borosilicate coverslips  
554 were extensively cleaned with Milli-Q water and isopropanol prior to the measurements.



555 sMAC (5  $\mu$ l) was applied to 10  $\mu$ l buffer (10 mM sodium phosphate, 145 mM NaCl, pH  
556 7.3) on a coverslip resulting in a final concentration 13  $\mu$ g/ml. Movies were acquired by  
557 using Acquire<sup>MP</sup> software for 6000 seconds with a frame rate of 100 Hz. The particle  
558 landing events detected were 5480 (5241 binding and 239 unbinding). All data was  
559 processed in Discover<sup>MP</sup> software. Masses of sMAC complexes were estimated by fitting  
560 a Kernel density distribution to the landing events. Gaussian fit to the mass of GroEL from  
561 the protein standard (800 kDa) was generated for peak width reference.

## 562 **Bacterial activation of serum**

563 *S. aureus* Wood 46 was grown on blood agar plate O.N. at 37°C. Next, bacteria were  
564 suspended in 200  $\mu$ l PBS of OD 1.5 and washed one time in PBS. The supernatant was  
565 removed and the bacterial pellet was incubated with 250  $\mu$ l serum for 3 h at 37°C while  
566 shaking. The sample was then centrifuged at 13000 rpm for 3 min. The supernatant was  
567 collected and the centrifugation step repeated. The supernatant (serum) was then kept  
568 on ice and filtered through a 0.22  $\mu$ m filter.

## 569 **SEC separation of serum samples**

570 An Agilent 1290 Infinity HPLC system (Agilent Technologies) consisting of a vacuum  
571 degasser, refrigerated autosampler with a 100  $\mu$ l injector loop, binary pump, thermostated  
572 two-column compartment, auto collection fraction module, and multi-wavelength detector,  
573 was used in this study. The dual-column set-up, comprising a tandem Yarra<sup>TM</sup> 4000-  
574 Yarra<sup>TM</sup> 3000 (SEC-4000, 300 x 7.8 mm i.d., 3  $\mu$ m, 500 Å; SEC-3000, 300 x 7.8 mm i.d.,  
575 3  $\mu$ m, 290 Å) two-stage set-up. Both columns were purchased from Phenomenex. The  
576 columns were cooled to 17°C while the other bays were chilled to 4°C to minimize sample

577 degradation. The mobile phase buffer consisted of 150 mM AMAC in water and filtered  
578 using a 0.22  $\mu\text{m}$  disposable membrane cartridge (Millipore) before use. Approximately  
579 1.25 mg of serum protein (activated and non-activated fresh serum) was injected per run.  
580 The proteins were eluted using isocratic flow within 60 min, and the flow rate was set to  
581 500  $\mu\text{l min}^{-1}$ . In total, 74 fractions were collected within a 20-42 time window using an  
582 automated fraction collector. The chromatograms were monitored at 280 nm.

### 583 **LC-MS/MS analysis of SEC fractions**

584 We used bottom-up LC-MS/MS analysis to determine SEC elution profile serum proteins.  
585 In total, we collected 74 SEC fractions which were digested by trypsin by the same  
586 procedure as described for bottom-up LC-MS/MS. Separation of digested protein  
587 samples was performed on an Agilent 1290 Infinity HPLC system (Agilent Technologies).  
588 Samples were loaded on a 100  $\mu\text{m} \times 20$  mm trap column (in-house packed with ReproSil-  
589 Pur C18-AQ, 3  $\mu\text{m}$ ) (Dr. Maisch GmbH, Ammerbuch-Entringen, Germany) coupled to a  
590 50  $\mu\text{m} \times 500$  mm analytical column (in-house packed with Poroshell 120 EC-C18, 2.7  $\mu\text{m}$ )  
591 (Agilent Technologies, Amstelveen). 10  $\mu\text{L}$  of digest from each SEC fraction was used  
592 and the amount  $\sim 0.1$   $\mu\text{g}$  of peptides was loaded on the LC column. The LC-MS/MS run  
593 time was set to 60 min with a 300 nL/min flow rate. Mobile phases A (water/0.1% formic  
594 acid) and B (80% ACN/0.1% formic acid) were used for 66 min gradient elution: 13–44%  
595 B for 35 min, and 44–100% B over 8 min. Samples were analyzed on a Thermo Scientific  
596 Q Exactive™ HF quadrupole-Orbitrap instrument (Thermo Scientific). Nano-electrospray  
597 ionization was achieved using a coated fused silica emitter (New Objective) biased to 2  
598 kV. The mass spectrometer was operated in positive ion mode, and the spectra were  
599 acquired in the data-dependent acquisition mode. Full MS scans were acquired with

600 60,000 resolution (at 200 m/z) and at a scan mass range of 375 to 1600 m/z. The AGC  
601 target was set to  $3 \times 10^6$  with a maximum injection time of 20 ms. Data-dependent MS/MS  
602 (dd-MS/MS) scan was acquired at 30,000 resolution (at 200 m/z) and with a mass range  
603 of 200 to 2000 m/z. AGC target was set to  $1 \times 10^5$  with a maximum injection time defined  
604 at 50 ms. One  $\mu$ scan was acquired in both full MS and dd-MS/MS scans. The data-  
605 dependent method was set to isolation and fragmentation of the 12 most intense peaks  
606 defined in a full MS scan. Parameters for isolation/fragmentation of selected ion peaks  
607 were set as follows: isolation width = 1.4 Th, HCD normalized collision energy (NCE) =  
608 27%. The LC-MS/MS data were searched against UniProtKB/Swiss-Prot human  
609 proteome sequence database with MaxQuant software (version 1.5.3.30) using the  
610 standard settings and trypsin as digestion enzyme. For label-free quantification iBAQ  
611 values were selected as output. For profiling of sMAC components in serum, each  
612 fraction's iBAQ values were extracted and normalized to the highest intensity.

### 613 **Modeling of the clusterin core**

614 Initial clusterin models were generated using trRosetta<sup>26</sup> with the clusterin sequence as  
615 input (Uniprot P10909). Alignment of the five generated models in PyMOL revealed a  
616 common core composed of residues 40-124 and 256-427. The three models with the best  
617 RMSD were selected for further modeling and used as input for comparative modeling  
618 using Modeller<sup>29</sup>. The five disulfide bonds were included as restraints for the modeling.  
619 The model with the lowest DOPE score was selected as the final model. The core of the  
620 model was verified by mapping the clusterin intra-links on the structure using PyMOL to  
621 obtain C $\alpha$ -C $\alpha$  distances.

622

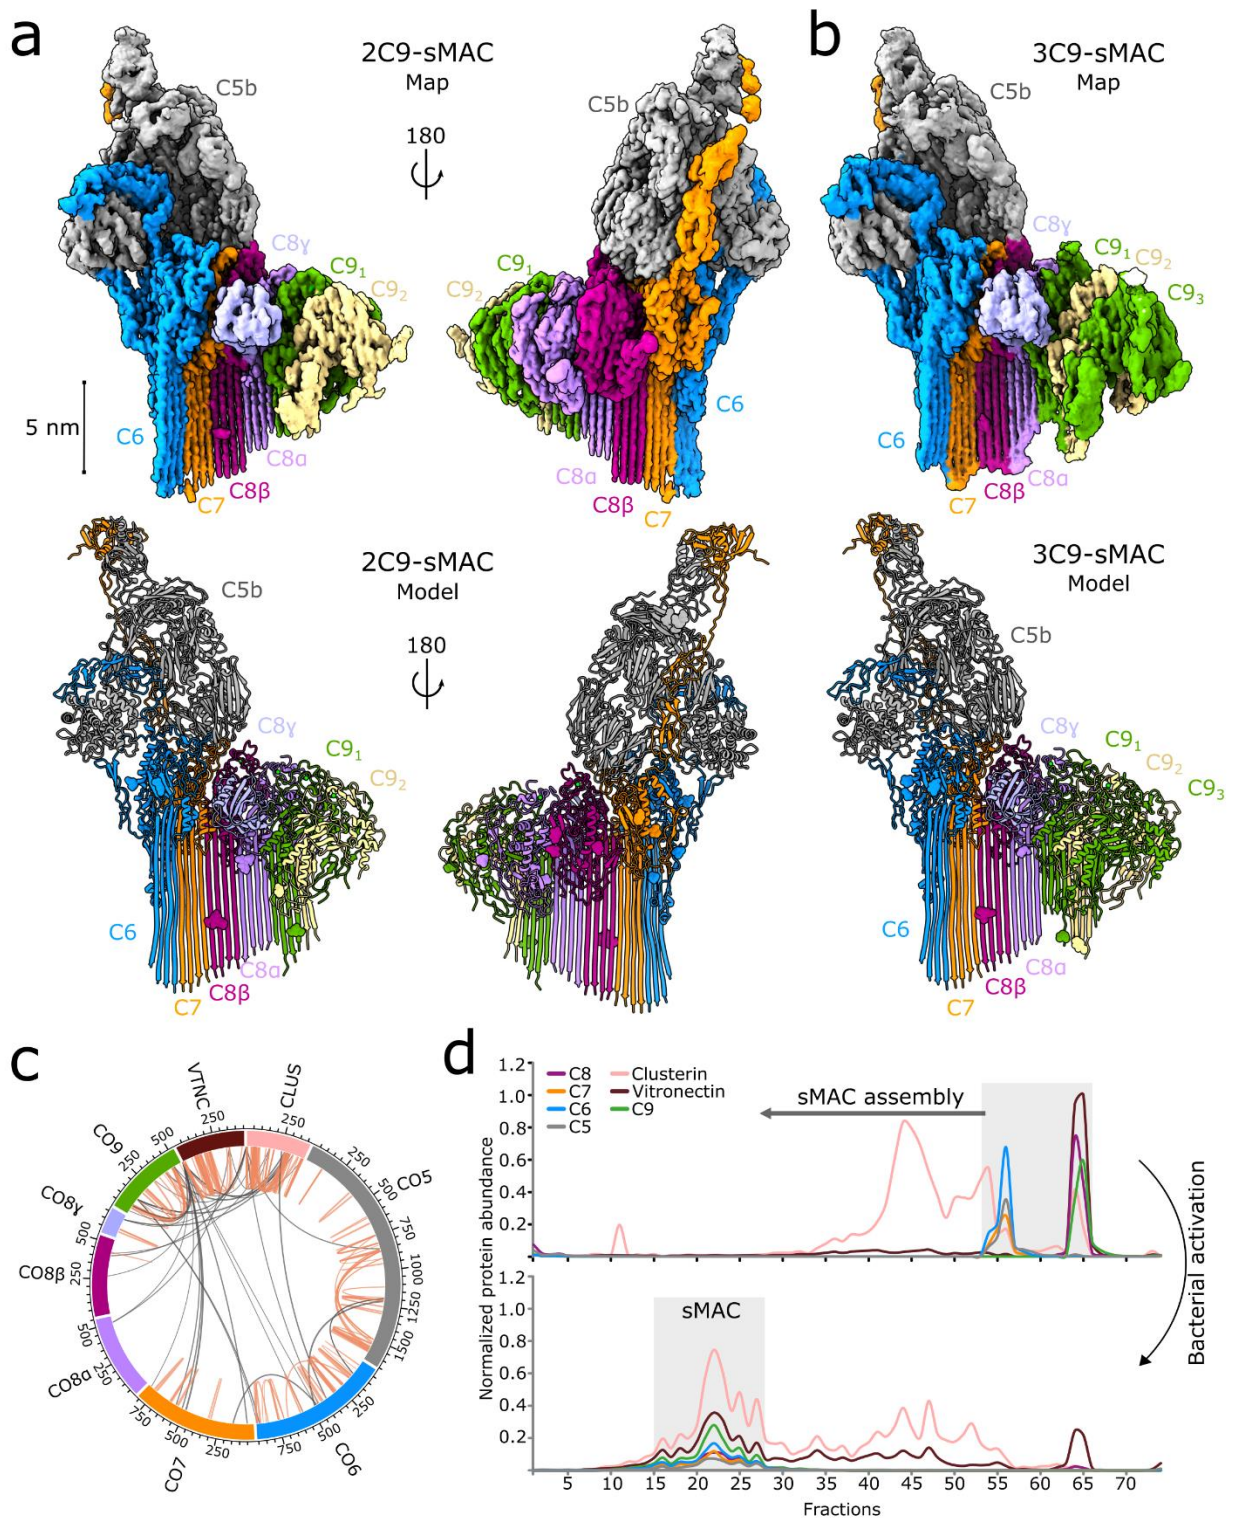

623

624 **Fig. 1.** sMAC is a complement activation macromolecule with a heterogeneous  
625 composition. (a) CryoEM reconstruction (top) and atomic model (bottom) of sMAC that  
626 consists of a core complement complex (C5b, C6, C7 and C8 $\alpha$ /C8 $\beta$ /C8 $\gamma$ ) together with  
627 two C9 molecules (C9<sub>1</sub>, C9<sub>2</sub>). (b) CryoEM reconstruction (top) and atomic model (bottom)  
628 of sMAC with the same core complement complex and three molecules of C9 (C9<sub>1</sub>, C9<sub>2</sub>,  
629 C9<sub>3</sub>). CryoEM density maps in a and b are colored according to protein composition.  
630 Glycans included in the atomic models are shown as surfaces in the ribbon diagrams. (c)  
631 sMAC circos plot of identified DMTMM cross-links within and across complement  
632 components (C5, C6, C7, C8, and C9). The complement components are cross-linked to  
633 the chaperones vitronectin (VTNC) and clusterin (CLUS). Intra-links are shown as orange  
634 lines and inter-links are shown as grey lines. (d) Profiling of sMAC components in  
635 nonactivated (top) and bacterial activated (bottom) serum. Serum was separated by SEC  
636 and the protein abundance (normalized iBAQ values) in each fraction determined by LC-  
637 MS/MS. The grey boxes indicate the elution of sMAC components in nonactivated and  
638 activated serum.  
639

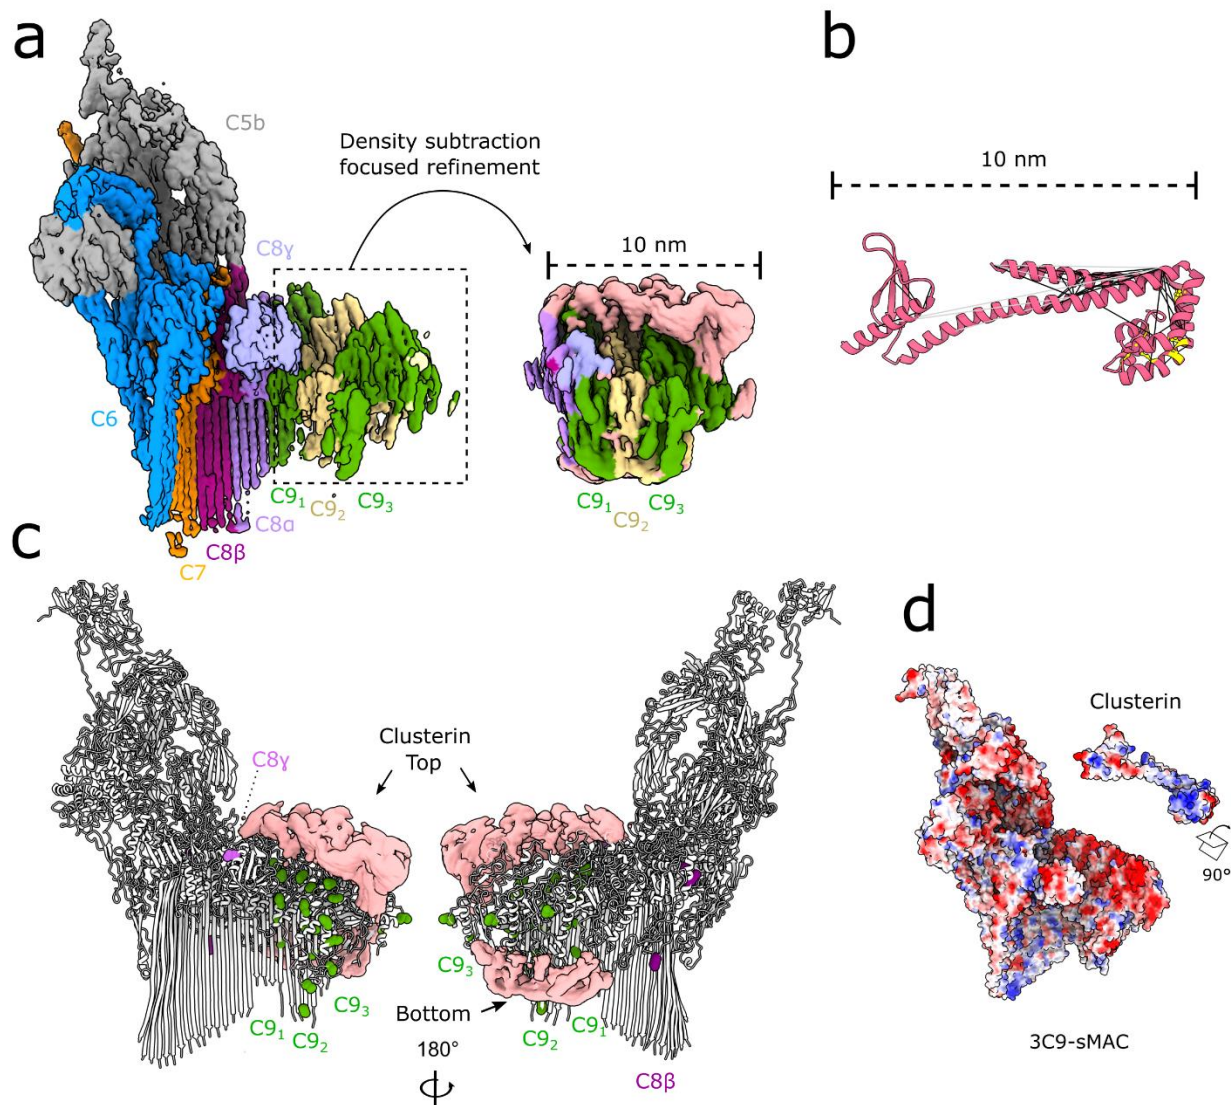

640

641 **Fig. 2.** Clusterin bridges complement proteins in sMAC through electrostatic interactions.

642 (a) CryoEM reconstruction of 3C9-sMAC highlighting the region used in subsequent  
643 focused refinements (black-dotted lines). Inset shows the map after density subtraction

644 of the core complement complex and refinement of the C9 oligomer. Density is colored  
645 according to protein composition, with regions of the map not accounted for by

646 complement proteins in pink. (b) Structural model for the clusterin core with intra-  
647 molecular clusterin cross-links derived from XL-MS mapped (black lines). Over-length

648 cross-links are shown as grey lines and known disulfide bonds within clusterin are shown

649 in yellow. (c) Intermolecular cross-links between clusterin and C8/C9 plotted on the 3C9-  
650 sMAC model (white ribbons). Complement protein residues involved in cross-links are  
651 shown as spheres colored according to protein composition. Density not corresponding  
652 to complement proteins in the focused refined map (pink surface) is overlaid for reference.  
653 (d) Coulombic electrostatic potential ranging from -10 (red) to 10 (blue) kcal/(mol-e)  
654 calculated from the models for complement proteins in 3C9-sMAC (bottom surface) and  
655 the clusterin core (top surface).  
656  
657

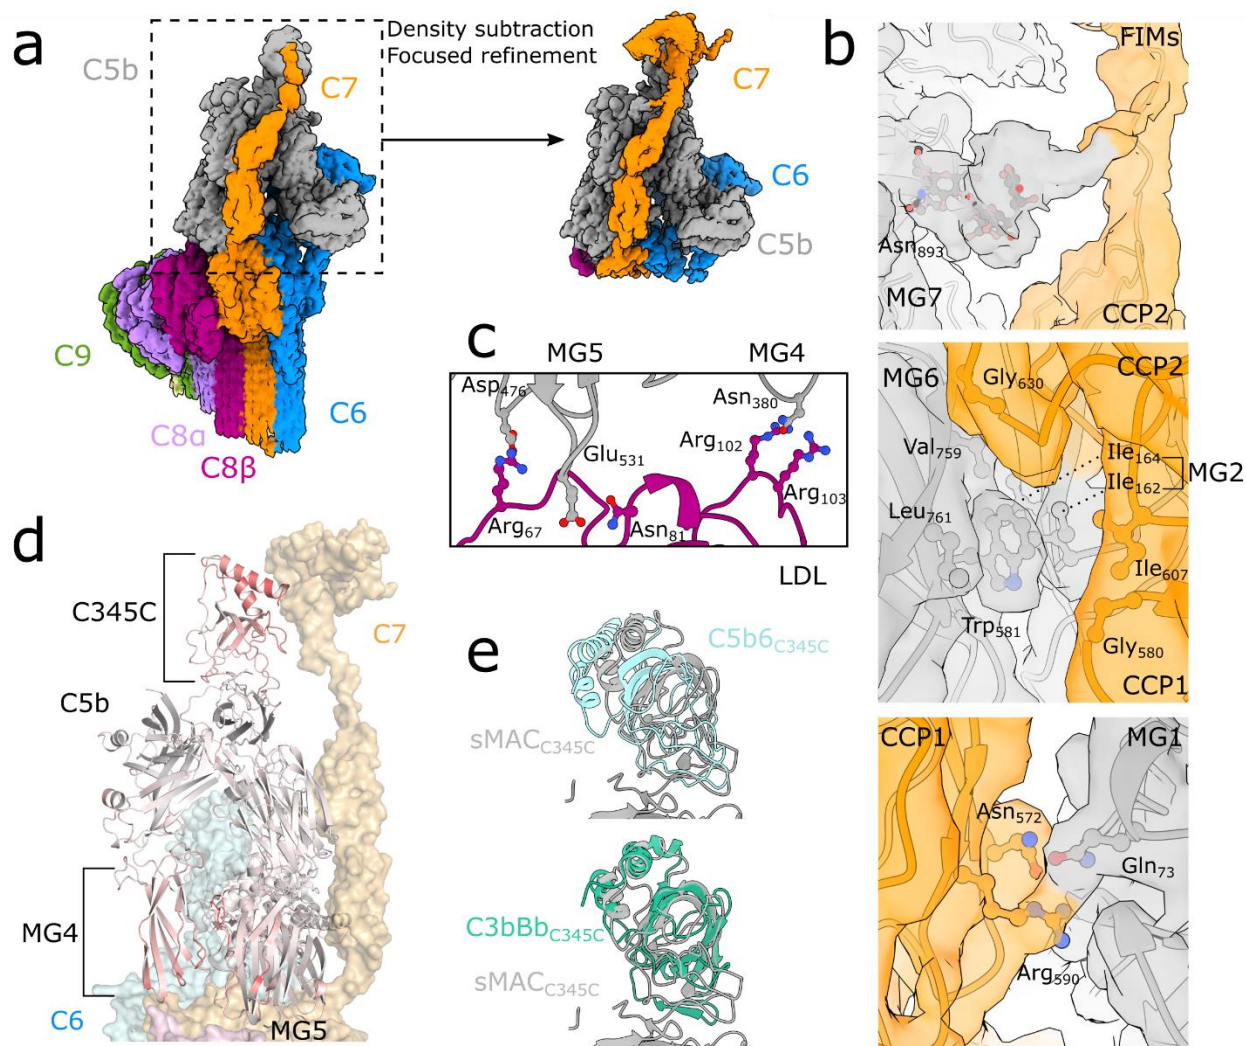

658

659 **Fig. 3.** C7 connects conformational changes of the C345C domain with the MG scaffold  
 660 of C5b. (a) CryoEM reconstruction of 2C9-sMAC highlighting the region used in  
 661 subsequent focused refinements (black-dotted lines). Inset corresponds to the map  
 662 resulting after density subtraction of the MACPF-arc and focused refinement on C5b.  
 663 Density is colored by protein composition. (b) Panels show density from the focused  
 664 refined map (colored by protein composition) overlaid with the sMAC atomic model  
 665 (ribbons) at three interaction interfaces between C7 (orange) and C5b (grey). Glycan  
 666 extending from C5b:Asn<sub>893</sub> stabilizes a linker between the C-terminal CCP and first FIM



667 domain of C7 (top). C5b:Tryp<sub>581</sub> locks into a hydrophobic hinge between the CCP1 and  
668 CCP2 domains of C7 (middle). Ionic interactions between the first CCP of C7 and the  
669 MG1 domain of C5b (bottom). Side-chains of interface residues shown as sticks. (c)  
670 Interface between the C8 $\beta$  LDL domain (purple) and C5b MG scaffold (MG4 and MG5 in  
671 grey). Side-chains of interface residues are shown as sticks. (d) C5b within sMAC  
672 (ribbons) colored by RMSD with superposed C5b from the C5b6 crystal structure (PDB  
673 ID: 4A5W). Red indicates residues with maximal differences. C345C, MG4 and MG5  
674 domains of C5b are highlighted. C6 (blue), C8 (pink) and C7 (orange) are shown as semi-  
675 transparent surfaces for reference. (e) Superposition of C5b within sMAC (grey) with  
676 corresponding residues in the soluble C5b6 complex (cyan) (PDB ID: 4A5W) showing  
677 movement of the C345C domain (top panel). Superposition of C5b from sMAC (grey) with  
678 the structural homologue C3b (green) from the C3b:Bb:Properdin complex (PDB ID:  
679 6RUR). In both panels, alignments were done on the full molecule and C345C domains  
680 were cropped for clarity.

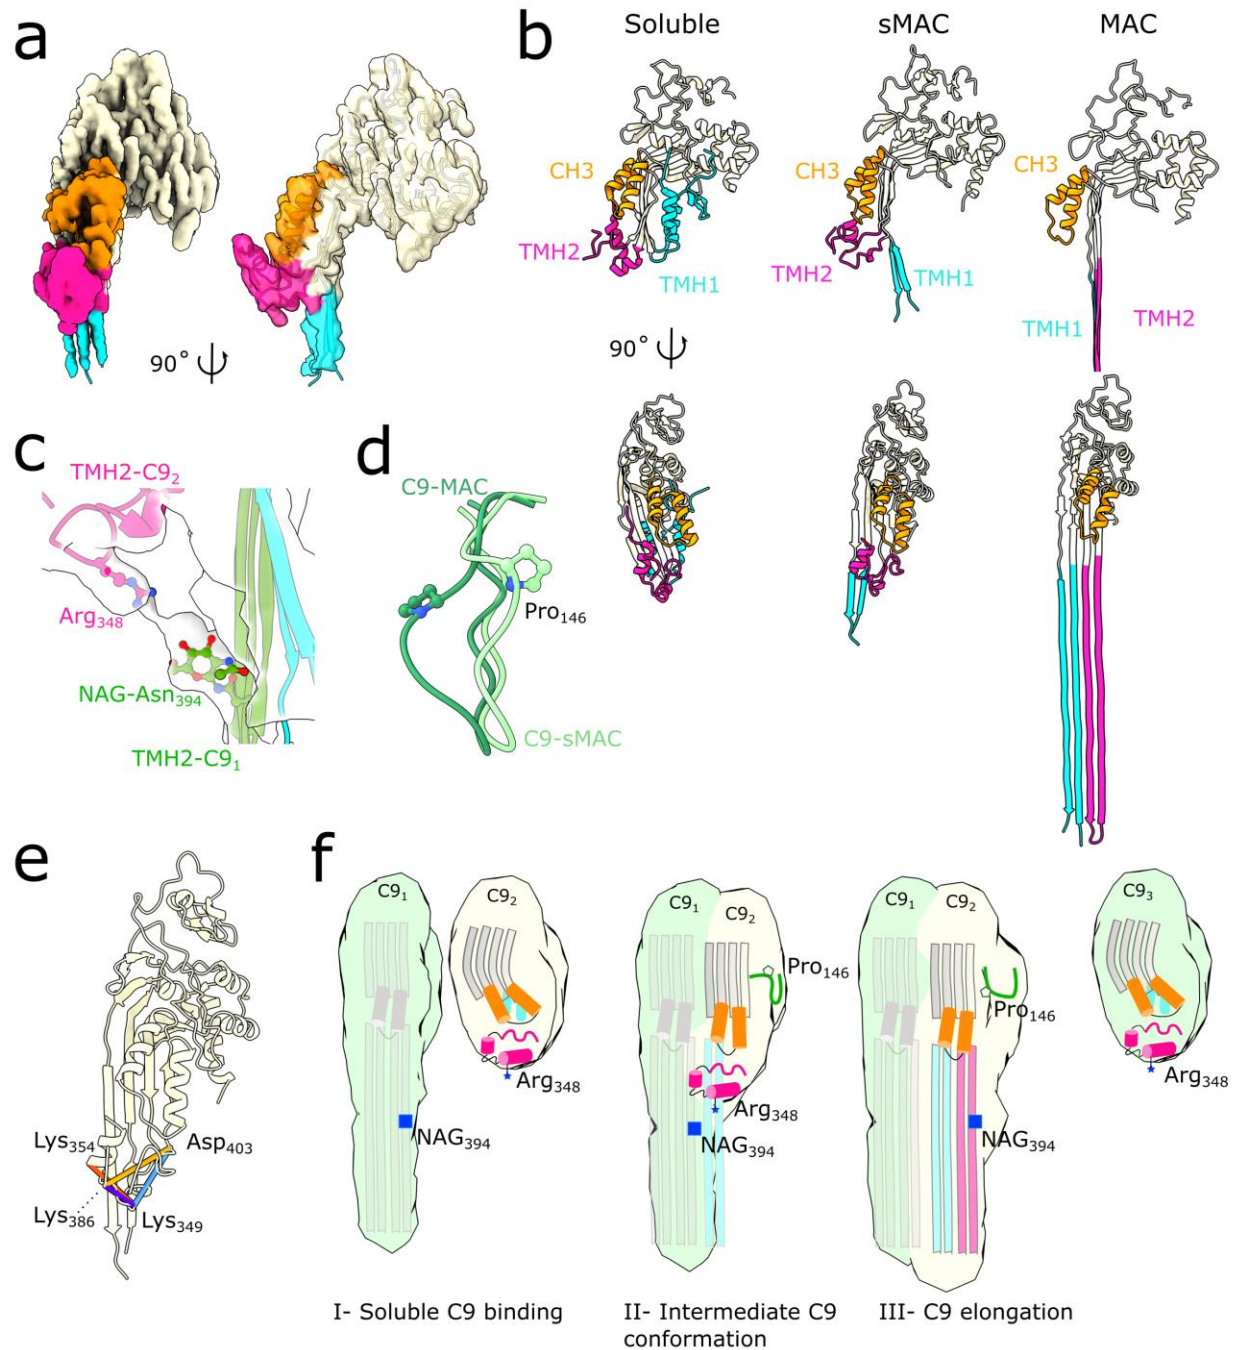

681

682 **Fig. 4.** sMAC traps an alternative conformation of C9. (a) Density for the terminal C9 in  
 683 the 2C9-sMAC reconstruction (EMD-12647). Density corresponding to the CH3 (orange),  
 684 TMH2 (pink) and TMH1 (blue) regions of the MACPF domain are highlighted. The  
 685 remainder of C9 is beige. Model for the alternative C9 conformation is overlaid (ribbon).

686 (b) Ribbon diagrams for three conformations of C9: soluble C9 from the murine crystal  
687 structure (PDB ID: 6CXO) left panel, terminal C9 in 2C9-sMAC, and transmembrane  
688 conformation of C9 in MAC (PDB ID: 6H03). CH3, TMH1 and TMH2 regions of the  
689 MACPF domain are colored as in a. For the MAC conformation, the full length of C9 TMH  
690 hairpins are shown in the bottom right panel. (c) Interaction between the penultimate C9  
691 TMH2  $\beta$ -hairpins (green) with the helical TMH2 of the terminal C9 (pink). Side-chains of  
692 interface residues (NAG-Asn<sub>394</sub> and Arg<sub>348</sub>) are shown as sticks. TMH1 of the terminal C9  
693 (blue) is shown for context. Density for this region is shown as a transparent surface. (d)  
694 Superposition of the C9 MACPF from MAC (dark green) and the conformation in the  
695 terminal C9 (light green) shows differences in a loop that contains the disease affected  
696 residue Pro<sub>146</sub> (P146S). (e) Cross-links between TMH2 residues (Lys<sub>354</sub>, Lys<sub>386</sub>, Lys<sub>349</sub>,  
697 Asp<sub>403</sub>) derived from XL-MS and mapped on the terminal C9 conformation of 2C9-sMAC.  
698 Distance lengths: 9 Å (purple), 14 Å (red), 17 Å (blue), 20 Å (yellow) are shown. (f)  
699 Schematic showing structural timeline of MACPF pore formation. In the soluble  
700 conformation (C9<sub>2</sub>, C9<sub>3</sub>), the MACPF domain comprises a central kinked  $\beta$ -sheet (grey)  
701 and the pore-forming residues within TMH1 (blue) and TMH2 (pink) are helical. Upon  
702 binding the leading edge of the oligomer (C9<sub>1</sub>), the central  $\beta$ -sheet straightens and two  
703 other MACPF regions: CH3 (orange) and a proline loop (green) rotate as TMH1 (blue) is  
704 released. The intermediate conformation is stabilized by the interaction between a basic  
705 residue on TMH2 (Arg<sub>348</sub>) with a glycan on the  $\beta$ -strands of the preceding monomer (NAG-  
706 Asn<sub>394</sub>). This interaction may play a role in positioning TMH2 before the hairpins are  
707 sequentially released to propagate the pore.  
708

709

## 710 **Data Availability**

711 Data supporting the findings of this manuscript are available from the corresponding  
712 authors upon reasonable request. A reporting summary for this article is available as a  
713 Supplementary Information file. Source data underlying (Fig. 1c, Fig. 2b, Fig. 4e,  
714 Supplementary Fig. 3d-f, Supplementary Fig. 4c-f, and Supplementary Fig. 5a-b) are  
715 provided as a Source Data file. The accession numbers for EM maps and models of  
716 sMAC reported in this paper are EMD-12646, EMD-12647, EMD-12648, EMD-12649,  
717 EMD-12650, EMD-12651 and PDB 7NYC, PDB 7NYD. The MS data from this publication  
718 have been deposited to the ProteomeXchange partner MassIVE database and assigned  
719 the identifier MSV000087092 (**Reviewer account details:** Username:  
720 MSV000087092\_reviewer; Password: sMAC\_Reviewer)

721

## 722 **Acknowledgements**

723 We thank S. Islam for computational support and P. Simpson for EM support. Initial  
724 screening of samples was carried out at Imperial College London Centre for Structural  
725 Biology; cryoEM data was collected at Diamond Light Source. We thank Diamond for  
726 access and support of the Cryo-EM facilities at the UK national electron bio-imaging  
727 centre (eBIC), proposal EM18659, funded by the Wellcome Trust, MRC, and BBSRC. We  
728 acknowledge Maartje Ruyken and Suzan Rooijackers (UMCU, Utrecht) for assistance in  
729 preparing the serum samples treated with *S. aureus* bacteria. This project has received  
730 funding from the European Research Council (ERC) under the European Union's Horizon  
731 2020 research and innovation programme (grant agreement No. 864751) to D.B.; E.C. is

732 supported by the CRUK Convergence Science Centre at Imperial College London  
733 (C24523/A26234) and the EPSRC Centre for Doctoral Training: Chemical Biology:  
734 Physical Sciences Innovation (EP/L015498/1). M.V.L., V.F. and A.J.R.H. acknowledge  
735 support from the Netherlands Organization for Scientific Research (NWO) funding the  
736 Netherlands Proteomics Centre through the X-omics Road Map program (project  
737 184.034.019) and the ENW-PPP project 741.018.201, and the EU Horizon 2020 program  
738 INFRAIA project Epic-XS (Project 823839). M.V.L. further acknowledges fellowship  
739 support from the Independent Research Fund Denmark (Project 9036-00007B).

740

#### 741 **Author Contributions**

742 A.M. conducted cryoEM work. A.M. and E.C. built and refined atomic models of  
743 complement proteins. A.M. and M.V.L. generated structural models for clusterin. M.V.L.  
744 and V.F. performed mass spectrometry experiments. A.M., D.B., V.F. and A.J.R.H.  
745 conceived the ideas. A.M. and D.B. analyzed cryoEM data. M.V.L., V.F. and A.J.R.H.  
746 analyzed mass spectrometry data. D.B. wrote the manuscript. A.M. and M.V.L. generated  
747 the figures. All authors assisted with manuscript editing.

748

#### 749 **Competing Interests Statement**

750 The authors declare that there are no competing interests.

751

#### 752 **References**

- 753 1. Tomlinson, S., Taylor, P.W., Morgan, B.P. & Luzio, J.P. Killing of gram-negative  
754 bacteria by complement. Fractionation of cell membranes after complement C5b-  
755 9 deposition on to the surface of *Salmonella minnesota* Re595. *Biochem J* **263**,  
756 505-11 (1989).

- 757 2. Brodsky, R.A. Paroxysmal nocturnal hemoglobinuria. *Blood* **124**, 2804-11 (2014).  
758 3. Morgan, B.P. & Harris, C.L. Complement, a target for therapy in inflammatory  
759 and degenerative diseases. *Nat Rev Drug Discov* **14**, 857-77 (2015).  
760 4. Farkas, I. et al. CD59 blocks not only the insertion of C9 into MAC but inhibits ion  
761 channel formation by homologous C5b-8 as well as C5b-9. *J Physiol* **539**, 537-45  
762 (2002).  
763 5. Doorduyn, D.J. et al. Bacterial killing by complement requires direct anchoring of  
764 membrane attack complex precursor C5b-7. *PLoS Pathog* **16**, e1008606 (2020).  
765 6. Suresh, R., Chandrasekaran, P., Sutterwala, F.S. & Mosser, D.M. Complement-  
766 mediated 'bystander' damage initiates host NLRP3 inflammasome activation. *J*  
767 *Cell Sci* **129**, 1928-39 (2016).  
768 7. Chiu, Y.Y., Nisihara, R.M., Würzner, R., Kirschfink, M. & de Messias-Reason, I.J.  
769 SC5b-9 is the most sensitive marker in assessing disease activity in Brazilian  
770 SLE patients. *J Investig Allergol Clin Immunol* **8**, 239-44 (1998).  
771 8. Mizuno, M. et al. High Levels of Soluble C5b-9 Complex in Dialysis Fluid May  
772 Predict Poor Prognosis in Peritonitis in Peritoneal Dialysis Patients. *PLoS One*  
773 **12**, e0169111 (2017).  
774 9. Mezö, B. et al. Validation of Early Increase in Complement Activation Marker  
775 sC5b-9 as a Predictive Biomarker for the Development of Thrombotic  
776 Microangiopathy After Stem Cell Transplantation. *Front Med (Lausanne)* **7**,  
777 569291 (2020).  
778 10. Lammerts, R.G.M. et al. Urinary Properdin and sC5b-9 Are Independently  
779 Associated With Increased Risk for Graft Failure in Renal Transplant Recipients.  
780 *Front Immunol* **10**, 2511 (2019).  
781 11. Zhao, W.T. et al. Diagnostic roles of urinary kidney injury molecule 1 and soluble  
782 C5b-9 in acute tubulointerstitial nephritis. *Am J Physiol Renal Physiol* **317**, F584-  
783 F592 (2019).  
784 12. Murphy, B.F., Kirszbaum, L., Walker, I.D. & d'Apice, A.J. SP-40,40, a newly  
785 identified normal human serum protein found in the SC5b-9 complex of  
786 complement and in the immune deposits in glomerulonephritis. *J Clin Invest* **81**,  
787 1858-64 (1988).  
788 13. Bhakdi, S. & Trantum-Jensen, J. Terminal membrane C5b-9 complex of human  
789 complement: transition from an amphiphilic to a hydrophilic state through binding  
790 of the S protein from serum. *J Cell Biol* **94**, 755-9 (1982).  
791 14. Hadders, M.A. et al. Assembly and regulation of the membrane attack complex  
792 based on structures of C5b6 and sC5b9. *Cell Rep* **1**, 200-7 (2012).  
793 15. Serna, M., Giles, J.L., Morgan, B.P. & Bubeck, D. Structural basis of complement  
794 membrane attack complex formation. *Nat Commun* **7**, 10587 (2016).  
795 16. Menny, A. et al. CryoEM reveals how the complement membrane attack complex  
796 ruptures lipid bilayers. *Nat Commun* **9**, 5316 (2018).  
797 17. Spicer, B.A. et al. The first transmembrane region of complement component-9  
798 acts as a brake on its self-assembly. *Nat Commun* **9**, 3266 (2018).  
799 18. Shiota, M. et al. Clusterin is a critical downstream mediator of stress-induced YB-  
800 1 transactivation in prostate cancer. *Mol Cancer Res* **9**, 1755-66 (2011).

- 801 19. McDonald, J.F. & Nelsestuen, G.L. Potent inhibition of terminal complement  
802 assembly by clusterin: characterization of its impact on C9 polymerization.  
803 *Biochemistry* **36**, 7464-73 (1997).
- 804 20. Beeg, M. et al. Clusterin Binds to A $\beta$ 1-42 Oligomers with High Affinity and  
805 Interferes with Peptide Aggregation by Inhibiting Primary and Secondary  
806 Nucleation. *J Biol Chem* **291**, 6958-66 (2016).
- 807 21. DeMattos, R.B. et al. ApoE and clusterin cooperatively suppress Abeta levels  
808 and deposition: evidence that ApoE regulates extracellular Abeta metabolism in  
809 vivo. *Neuron* **41**, 193-202 (2004).
- 810 22. Roussotte, F.F. et al. Combined effects of Alzheimer risk variants in the CLU and  
811 ApoE genes on ventricular expansion patterns in the elderly. *J Neurosci* **34**,  
812 6537-45 (2014).
- 813 23. Preissner, K.P., Podack, E.R. & Müller-Eberhard, H.J. SC5b-7, SC5b-8 and  
814 SC5b-9 complexes of complement: ultrastructure and localization of the S-protein  
815 (vitronectin) within the macromolecules. *Eur J Immunol* **19**, 69-75 (1989).
- 816 24. Liang, H.C. et al. Glycosylation of Human Plasma Clusterin Yields a Novel  
817 Candidate Biomarker of Alzheimer's Disease. *J Proteome Res* **14**, 5063-76  
818 (2015).
- 819 25. Choi-Miura, N.H., Takahashi, Y., Nakano, Y., Tobe, T. & Tomita, M. Identification  
820 of the disulfide bonds in human plasma protein SP-40,40 (apolipoprotein-J). *J*  
821 *Biochem* **112**, 557-61 (1992).
- 822 26. Yang, J. et al. Improved protein structure prediction using predicted interresidue  
823 orientations. *Proc Natl Acad Sci U S A* **117**, 1496-1503 (2020).
- 824 27. Hallström, T. et al. CspA from *Borrelia burgdorferi* inhibits the terminal  
825 complement pathway. *mBio* **4**(2013).
- 826 28. Caesar, J.J., Wallich, R., Kraiczky, P., Zipfel, P.F. & Lea, S.M. Further structural  
827 insights into the binding of complement factor H by complement regulator-  
828 acquiring surface protein 1 (CspA) of *Borrelia burgdorferi*. *Acta Crystallogr Sect F*  
829 *Struct Biol Cryst Commun* **69**, 629-33 (2013).
- 830 29. Webb, B. & Sali, A. Comparative Protein Structure Modeling Using MODELLER.  
831 *Curr Protoc Bioinformatics* **54**, 5.6.1-5.6.37 (2016).
- 832 30. Pedersen, D.V. et al. Structural Basis for Properdin Oligomerization and  
833 Convertase Stimulation in the Human Complement System. *Front Immunol* **10**,  
834 2007 (2019).
- 835 31. Hadders, M.A., Beringer, D.X. & Gros, P. Structure of C8alpha-MACPF reveals  
836 mechanism of membrane attack in complement immune defense. *Science* **317**,  
837 1552-4 (2007).
- 838 32. Aleshin, A.E. et al. Structure of complement C6 suggests a mechanism for  
839 initiation and unidirectional, sequential assembly of membrane attack complex  
840 (MAC). *J Biol Chem* **287**, 10210-22 (2012).
- 841 33. Lovelace, L.L., Cooper, C.L., Sodetz, J.M. & Lebioda, L. Structure of human C8  
842 protein provides mechanistic insight into membrane pore formation by  
843 complement. *J Biol Chem* **286**, 17585-92 (2011).
- 844 34. Kremnitzka, M. et al. Functional analyses of rare genetic variants in complement  
845 component C9 identified in patients with age-related macular degeneration. *Hum*  
846 *Mol Genet* (2018).

- 847 35. Pang, S.S. et al. The cryo-EM structure of the acid activatable pore-forming  
848 immune effector Macrophage-expressed gene 1. *Nat Commun* **10**, 4288 (2019).
- 849 36. Law, R.H. et al. The structural basis for membrane binding and pore formation by  
850 lymphocyte perforin. *Nature* **468**, 447-51 (2010).
- 851 37. Ni, T. et al. Structure and mechanism of bactericidal mammalian perforin-2, an  
852 ancient agent of innate immunity. *Sci Adv* **6**, eaax8286 (2020).
- 853 38. Tschopp, J., Chonn, A., Hertig, S. & French, L.E. Clusterin, the human  
854 apolipoprotein and complement inhibitor, binds to complement C7, C8 beta, and  
855 the b domain of C9. *J Immunol* **151**, 2159-65 (1993).
- 856 39. Lakins, J.N. et al. Evidence that clusterin has discrete chaperone and ligand  
857 binding sites. *Biochemistry* **41**, 282-91 (2002).
- 858 40. Endo, Y. et al. Apolipoprotein E and clusterin inhibit the early phase of amyloid- $\beta$   
859 aggregation in an in vitro model of cerebral amyloid angiopathy. *Acta*  
860 *Neuropathol Commun* **7**, 12 (2019).
- 861 41. Matsubara, E., Soto, C., Governale, S., Frangione, B. & Ghiso, J. Apolipoprotein  
862 J and Alzheimer's amyloid beta solubility. *Biochem J* **316 ( Pt 2)**, 671-9 (1996).
- 863 42. Itakura, E., Chiba, M., Murata, T. & Matsuura, A. Heparan sulfate is a clearance  
864 receptor for aberrant extracellular proteins. *J Cell Biol* **219**(2020).
- 865 43. Cunin, P. et al. Clusterin facilitates apoptotic cell clearance and prevents  
866 apoptotic cell-induced autoimmune responses. *Cell Death Dis* **7**, e2215 (2016).
- 867 44. Naydenova, K. & Russo, C.J. Measuring the effects of particle orientation to  
868 improve the efficiency of electron cryomicroscopy. *Nat Commun* **8**, 629 (2017).
- 869 45. Scheres, S.H. RELION: implementation of a Bayesian approach to cryo-EM  
870 structure determination. *J Struct Biol* **180**, 519-30 (2012).
- 871 46. Rohou, A. & Grigorieff, N. CTFIND4: Fast and accurate defocus estimation from  
872 electron micrographs. *J Struct Biol* **192**, 216-21 (2015).
- 873 47. Wagner, T. et al. SPHIRE-crYOLO is a fast and accurate fully automated particle  
874 picker for cryo-EM. *Commun Biol* **2**, 218 (2019).
- 875 48. Zivanov, J., Nakane, T. & Scheres, S.H.W. Estimation of high-order aberrations  
876 and anisotropic magnification from cryo-EM data sets in. *IUCrJ* **7**, 253-267  
877 (2020).
- 878 49. Sanchez-Garcia, R. et al. DeepEMhancer: a deep learning solution for cryo-EM  
879 volume post-processing. *bioRxiv*, 2020.06.12.148296 (2020).
- 880 50. Phelan, M.M. et al. Solution structure of factor I-like modules from complement  
881 C7 reveals a pair of follistatin domains in compact pseudosymmetric  
882 arrangement. *J Biol Chem* **284**, 19637-49 (2009).
- 883 51. Emsley, P., Lohkamp, B., Scott, W.G. & Cowtan, K. Features and development  
884 of Coot. *Acta Crystallogr D Biol Crystallogr* **66**, 486-501 (2010).
- 885 52. Croll, T.I. ISOLDE: a physically realistic environment for model building into low-  
886 resolution electron-density maps. *Acta Crystallogr D Struct Biol* **74**, 519-530  
887 (2018).
- 888 53. Pettersen, E.F. et al. UCSF ChimeraX: Structure visualization for researchers,  
889 educators, and developers. *Protein Sci* **30**, 70-82 (2021).
- 890 54. Long, F. et al. AceDRG: a stereochemical description generator for ligands. *Acta*  
891 *Crystallogr D Struct Biol* **73**, 112-122 (2017).



- 892 55. Murshudov, G.N. et al. REFMAC5 for the refinement of macromolecular crystal  
893 structures. *Acta Crystallogr D Biol Crystallogr* **67**, 355-67 (2011).
- 894 56. Afonine, P.V. et al. New tools for the analysis and validation of cryo-EM maps  
895 and atomic models. *Acta Crystallogr D Struct Biol* **74**, 814-840 (2018).
- 896 57. Williams, C.J. et al. MolProbity: More and better reference data for improved all-  
897 atom structure validation. *Protein Sci* **27**, 293-315 (2018).
- 898 58. Cox, J. & Mann, M. MaxQuant enables high peptide identification rates,  
899 individualized p.p.b.-range mass accuracies and proteome-wide protein  
900 quantification. *Nat Biotechnol* **26**, 1367-72 (2008).
- 901 59. Chen, Z.L. et al. A high-speed search engine pLink 2 with systematic evaluation  
902 for proteome-scale identification of cross-linked peptides. *Nat Commun* **10**, 3404  
903 (2019).
- 904
